# Supplementary material for: The ACT and the ADJUST framework: Layering structured detection and clinical judgment in emergency department triage
Source: Research Square preprint supplement (doi:10.21203/rs.3.rs-7852065/v1), 2025-11-21
Supplement: Supplementary file 1 [file 3e941864aa6cf47860af78a7.docx]

**Supplementary File 1: Core Intake Criteria for Adaptive Clinical Triage (ACT)**

**1. Physiological thresholds**

- Adults: NEWS2 (National Early Warning Score version 2)
- Children: PEVS (Pediatric Early Warning Score, Norwegian adaptation [7]

| **Group** | **Parameter** | **Red** | **Orange** | **Yellow** | **Green** |
| --- | --- | --- | --- | --- | --- |
| **Adults** | NEWS2 score | ≥ 7 | ≥ 5 | Single = 3 | 0 – 4 |
| **Children (< 18 y)** | PEVS (PEWS) | ≥ 5 | = 4 | Single = 3 | ≤ 3 |

NEWS2 ≥ 7 or PEVS ≥ 5 triggers the Red category used for high-acuity analyses in this study.

**2. Urgency flags by system (ABCDE framework)**

A visual overview of these flags within the four-tier acuity scale is provided in Supplementary File 3.

**A – Airway**

- Stridor or airway obstruction
- Airway swelling
- Threatened airway

**B – Breathing**

- Severe respiratory distress
- Dyspnea at rest or on exertion
- Respiratory depression (> 5 below normal RR or respiratory depressant medication)
- Smoke inhalation (enclosed space)

**C – Circulation**

- Major trauma (according to national criteria)
- Severe or uncontrolled bleeding
- Controlled/compressible bleeding
- Chest pain

**D – Disability / Neurological**

- Acute neurological deficit
- Neurological deficit with onset 12–24 hours
- Ongoing seizures
- Post-ictal or resolved seizure (incl. known epilepsy)
- Thunderclap headache
- Syncope (single / repeated)
- Unconsciousness / altered mental status
- Head injury with anticoagulation
- Suicidal or aggressive behaviour
- Severe pain (any location)

**E – Exposure / Environment**

- Suspected hypothermia
- Distal neurovascular compromise
- Suspected sepsis (NEWS2 ≥ 5 or PEVS ≥ 4 + infection)
- Poisoning or hazardous exposure

**3. Professional concern override**

- Nurses may escalate acuity based on professional judgement even when thresholds are not met.
- Such discretionary escalation is logged as *Clinical concern* in data extractions.

**4. Category descriptions and monitoring expectations**

| **Category** | **Clinical mandate** | **Physician review** | **Monitoring frequency** |
| --- | --- | --- | --- |
| **Red (Critical)** | Immediate response | Immediate | Continuous |
| **Orange (Acute)** | Urgent review | ≤30 minutes | Every 30 minutes |
| **Yellow (Subacute)** | Delayed review | ≤60 minutes | Hourly |
| **Green (Can wait)** | Low urgency | As capacity allows | Every 2 hours |

**5. Pediatric reference values (PEVS)**

*(adapted from Solevåg et al., Akuttveileder i pediatri [7])*

| **Age** | **Respiratory rate (breaths/min)** | **Resting heart rate (beats/min)** | **Systolic BP (mmHg)** | **Diastolic BP (mmHg)** |
| --- | --- | --- | --- | --- |
| 0–1 month | 40–55 | 100–160 | 65–95 | 35–55 |
| 1–13 months | 35–45 | 100–160 | 75–100 | 45–55 |
| 13 months–4 yr | 25–35 | 90–130 | 80–105 | 40–60 |
| 4–7 yr | 20–24 | 70–120 | 85–110 | 45–70 |
| 7–13 yr | 19–22 | 70–110 | 95–115 | 50–75 |
| 13–18 yr | 14–19 | 55–95 | 105–125 | 50–80 |

**Clinical principles**

- ACT is a prioritisation tool, not a diagnostic system.
- Patients must be re-triaged if expected review intervals are exceeded.
- Nurse concern justifies up-triage at any time.
- Only physicians may down-triage after review.

Reference

[7] Solevåg AL, Hinna UT, Eggen EH, Engan M, Gundersen AI, Døllner H. *Pediatrisk tidlig varslingsskår, triage og kommunikasjon*. Akuttveileder i pediatri, Helsebiblioteket. Updated 01.01.2021. Available at: [1.13 Pediatrisk tidlig varslingsskår, triage og kommunikasjon - Helsebiblioteket](https://www.helsebiblioteket.no/innhold/retningslinjer/pediatri/akuttveileder-i-pediatri/1.akutte-prosedyrer-og-tilstander-inkludert-ulykker/1.14-pediatrisk-tidlig-varslingsskar-triage-og-kommunikasjon)
