# Supplementary material for: The ACT and the ADJUST framework: Layering structured detection and clinical judgment in emergency department triage
Source: Research Square preprint supplement (doi:10.21203/rs.3.rs-7852065/v1), 2025-11-21
Supplement: Supplementary file 1 [file 640066e87f07ea3b706426a9.pdf]

### **Supplementary File 3. Paper-based ACT intake form (v1.0, as applied in this study)**

#### **Legend:**

*Paper template of the Acuity Categorization Tool (ACT) used during the study period. In practice, ACT was implemented electronically on the ED trackboard; this paper version is provided to illustrate the tool's structure and layout. The form includes both adult and pediatric intake criteria (v1.0) as applied in this study.*

*© 2025 Vestfold Hospital Trust. Provided for academic transparency; not for commercial use.*

|   | Critical                                                      | Acute                                                        | Subacute                                                 |                           |
|---|---------------------------------------------------------------|--------------------------------------------------------------|----------------------------------------------------------|---------------------------|
| A | <div><div></div>Stridor, airway obstruction</div>             |                                                              |                                                          |                           |
|   | <div><div></div>Airway swelling</div>                         |                                                              |                                                          |                           |
|   | <div><div></div>Threatened airway</div>                       |                                                              |                                                          |                           |
| B | <div><div></div>Severe respiratory distress</div>             | <div><div></div>Dyspnea at rest</div>                        | <div><div></div>Dyspnea on exertion</div>                |                           |
|   | <div><div></div>Respiratory depression</div>                  |                                                              |                                                          |                           |
|   | <div><div></div>Smoke inhalation (enclosed space)</div>       |                                                              |                                                          |                           |
| C | <div><div></div>Major trauma (see trauma criteria)</div>      |                                                              |                                                          |                           |
|   | <div><div></div>Severe / uncontrolled bleeding</div>          |                                                              | <div><div></div>Compressible / controlled bleeding</div> |                           |
|   |                                                               | <div><div></div>Chest pain</div>                             |                                                          |                           |
| D | <div><div></div>Severe pain</div>                             | <div><div></div>Moderate pain</div>                          | <div><div></div>Mild pain</div>                          |                           |
|   | <div><div></div>Acute neurological deficit</div>              | <div><div></div>Neurological deficit with onset 12–24h</div> |                                                          |                           |
|   | <div><div></div>Ongoing seizures</div>                        | <div><div></div>Resolved seizure</div>                       | <div><div></div>Post-ictal (known epilepsy)</div>        |                           |
| E | <div><div></div>Thunderclap headache</div>                    | <div><div></div>Repeated syncope / near-syncope</div>        | <div><div></div>Single syncope</div>                     |                           |
|   | <div><div></div>Unconsciousness</div>                         | <div><div></div>Altered mental status</div>                  |                                                          |                           |
|   |                                                               | <div><div></div>Head injury with anticoagulation</div>       |                                                          |                           |
|   |                                                               | <div><div></div>Suicidal or aggressive behavior</div>        |                                                          |                           |
|   | <div><div></div>Suspected hypothermia</div>                   | <div><div></div>Distal neurovascular compromise</div>        |                                                          |                           |
|   | <div><div></div>Suspected sepsis (NEWS2 ≥5 + infection)</div> | <div><div></div>Poisoning or hazardous exposure</div>        |                                                          |                           |
|   | <div><div></div>NEWS ≥ 7</div>                                | <div><div></div>NEWS ≥ 5</div>                               | <div><div></div>SINGEL 3</div>                           | <div><div></div>≤ 4</div> |

NO FINDINGS

|                                                     |                                |  |  |  |   |
|-----------------------------------------------------|--------------------------------|--|--|--|---|
| A+B                                                 | Provider sign.                 |  |  |  |   |
|                                                     | Time                           |  |  |  |   |
|                                                     | ≥25                            |  |  |  | 3 |
| Respiratory rate (breaths/min)                      | 21-24                          |  |  |  | 2 |
|                                                     | 18-20                          |  |  |  |   |
|                                                     | 15-17                          |  |  |  | 0 |
|                                                     | 12-14                          |  |  |  |   |
|                                                     | 9-11                           |  |  |  | 1 |
|                                                     | ≤8                             |  |  |  | 3 |
| A+B                                                 | SpO <sub>2</sub> Scale 1       |  |  |  | 0 |
|                                                     | ≥96                            |  |  |  | 1 |
|                                                     | 94-95                          |  |  |  | 2 |
| SpO <sub>2</sub> Scale 2*                           | 92-93                          |  |  |  | 3 |
|                                                     | ≤91                            |  |  |  | 3 |
| (for target 88–92%, e.g. COPD, chronic hypercapnia) | ≥97 on O <sub>2</sub>          |  |  |  | 3 |
|                                                     | 95-96 on O <sub>2</sub>        |  |  |  | 2 |
|                                                     | 93-94 on O <sub>2</sub>        |  |  |  | 1 |
|                                                     | ≥93 room air                   |  |  |  | 0 |
|                                                     | 88-92                          |  |  |  |   |
|                                                     | 86-87                          |  |  |  | 1 |
|                                                     | 84-85                          |  |  |  | 2 |
|                                                     | ≤83                            |  |  |  | 3 |
| Room air or oxygen?                                 | Room air                       |  |  |  | 0 |
|                                                     | O <sub>2</sub> L/min           |  |  |  | 2 |
|                                                     | Adm. måte                      |  |  |  | 0 |
| C                                                   | ≥220                           |  |  |  | 3 |
|                                                     | Systolic blood pressure (mmHg) |  |  |  |   |
|                                                     | 201-219                        |  |  |  |   |
|                                                     | 181-200                        |  |  |  |   |
|                                                     | 161-180                        |  |  |  | 0 |
|                                                     | 141-160                        |  |  |  |   |
|                                                     | 121-140                        |  |  |  |   |
|                                                     | 111-120                        |  |  |  |   |
|                                                     | 101-110                        |  |  |  | 1 |
|                                                     | 91-100                         |  |  |  | 2 |
|                                                     | 81-90                          |  |  |  |   |
|                                                     | 71-80                          |  |  |  | 3 |
|                                                     | 61-70                          |  |  |  |   |
|                                                     | 51-60                          |  |  |  |   |
|                                                     | ≤50                            |  |  |  |   |
| C                                                   | ≥131                           |  |  |  | 3 |
|                                                     | Heart rate (beats/min)         |  |  |  |   |
|                                                     | 121-130                        |  |  |  | 2 |
|                                                     | 111-120                        |  |  |  |   |
|                                                     | 101-110                        |  |  |  | 1 |
|                                                     | 91-100                         |  |  |  |   |
|                                                     | 81-90                          |  |  |  |   |
|                                                     | 71-80                          |  |  |  | 0 |
|                                                     | 61-70                          |  |  |  |   |
|                                                     | 51-60                          |  |  |  |   |
|                                                     | 41-50                          |  |  |  | 1 |
|                                                     | 31-40                          |  |  |  | 3 |
|                                                     | ≤30                            |  |  |  |   |
| D                                                   | Alert                          |  |  |  | 0 |
|                                                     | Confusion                      |  |  |  |   |
|                                                     | Verbal                         |  |  |  | 3 |
| Level of consciousness (AVPU)                       | Pain                           |  |  |  |   |
|                                                     | Unresponsive                   |  |  |  |   |
| E                                                   | ≥39,1°                         |  |  |  | 2 |
|                                                     | Temperature (°C)               |  |  |  |   |
|                                                     | 38,1-39,0°                     |  |  |  | 1 |
|                                                     | 37,1-38,0°                     |  |  |  | 0 |
|                                                     | 36,1-37,0°                     |  |  |  |   |
|                                                     | 35,1-36,0°                     |  |  |  | 1 |
|                                                     | ≤35,0°                         |  |  |  | 3 |
| ← Total NEWS                                        |                                |  |  |  |   |

|   | Critical                                                     | Acute                                                        | Subacute                                                 |
|---|--------------------------------------------------------------|--------------------------------------------------------------|----------------------------------------------------------|
| A | <div><div></div>Stridor, airway obstruction</div>            |                                                              |                                                          |
|   | <div><div></div>Airway swelling</div>                        |                                                              |                                                          |
|   | <div><div></div>Threatened airway</div>                      |                                                              |                                                          |
|   |                                                              |                                                              |                                                          |
| B | <div><div></div>Severe respiratory</div>                     | <div><div></div>Dyspnea at rest</div>                        | <div><div></div>Dyspnea on exertion</div>                |
|   | <div><div></div>Respiratory depression</div>                 |                                                              |                                                          |
|   | <div><div></div>Smoke inhalation (enclosed space)</div>      |                                                              |                                                          |
|   |                                                              |                                                              |                                                          |
| C | <div><div></div>Major trauma (see trauma</div>               |                                                              |                                                          |
|   | <div><div></div>Severe / uncontrolled bleeding</div>         |                                                              | <div><div></div>Compressible / controlled bleeding</div> |
|   |                                                              | <div><div></div>Chest pain</div>                             |                                                          |
|   |                                                              |                                                              |                                                          |
| D | <div><div></div>Severe pain</div>                            | <div><div></div>Moderate pain</div>                          | <div><div></div>Mild pain</div>                          |
|   | <div><div></div>Acute neurological deficit</div>             | <div><div></div>Neurological deficit with onset 12–24h</div> |                                                          |
|   | <div><div></div>Ongoing seizures</div>                       | <div><div></div>Resolved seizure</div>                       | <div><div></div>Post-ictal (known epilepsy)</div>        |
|   | <div><div></div>Thunderclap headache</div>                   | <div><div></div>Repeated syncope / near-syncope</div>        | <div><div></div>Single syncope</div>                     |
| E | <div><div></div>Unconsciousness</div>                        | <div><div></div>Altered mental status</div>                  |                                                          |
|   |                                                              | <div><div></div>Head injury with anticoagulation</div>       |                                                          |
|   |                                                              | <div><div></div>Suicidal or aggressive</div>                 |                                                          |
|   |                                                              |                                                              |                                                          |
| E | <div><div></div>Suspected hypothermia</div>                  | <div><div></div>Distal neurovascular</div>                   |                                                          |
|   | <div><div></div>Suspected sepsis (PEVS ≥4 + infection)</div> | <div><div></div>Poisoning or hazardous exposure</div>        |                                                          |

NO FINDINGS

|             |                            |                                    |  |
|-------------|----------------------------|------------------------------------|--|
|             |                            | Provider sign.                     |  |
|             |                            | Time                               |  |
| A+B         | Breaths/min                | ≥ 30 over                          |  |
|             |                            | ≥ 20 over                          |  |
|             |                            | ≥10 over                           |  |
|             |                            | Within normal                      |  |
| Breathing   | Age adjusted normal        | ≥ 5 under                          |  |
|             |                            |                                    |  |
|             |                            |                                    |  |
|             |                            |                                    |  |
|             | Increased effort           | None                               |  |
|             |                            | Subcostal/intercostal retractions  |  |
|             |                            | Jugular retractions                |  |
|             |                            | Severe retractions                 |  |
|             | O <sub>2</sub> requirement | >5 below normal + resp. depressant |  |
|             |                            | ≥ 8 L/ min                         |  |
|             |                            | ≥ 5 L/ min                         |  |
|             |                            | ≥1-5 L/ min                        |  |
|             | Support Devices            | 0 L/ min                           |  |
|             |                            | Nebulizer > every 15 min           |  |
|             |                            | HFNC                               |  |
|             |                            | CPAP/BPAP                          |  |
|             | Skin colour                | Normal                             |  |
|             |                            | Pale                               |  |
|             |                            | Cyanotic                           |  |
|             |                            | Cyanotic and mottled               |  |
| C           | Capillary refill time      | 1-2 sec                            |  |
|             |                            | 3 sec                              |  |
|             |                            | 4 sec                              |  |
|             |                            | ≥ 5 sec                            |  |
| Circulation | Heart rate                 | ≥ 30 over                          |  |
|             |                            | ≥ 20 over                          |  |
|             |                            | Within normal                      |  |
|             |                            | ≥ 5 under                          |  |
|             |                            | Awake                              |  |
|             |                            | Normal interaction                 |  |
|             |                            | Interested in surroundings         |  |
|             |                            | Lethargic                          |  |
| D           | Behaviour                  | Reduced activity                   |  |
|             |                            | Sleeping                           |  |
|             |                            | Somnolent / drowsy                 |  |
|             |                            | Irritable                          |  |
|             |                            | Unconscious                        |  |
|             |                            | Seizures                           |  |
|             |                            | Reduced response to pain           |  |
|             |                            |                                    |  |
| X           |                            | Persistent vomiting                |  |
|             |                            | Postoperative vomiting             |  |

Use highest score per category

|                            |  |  |
|----------------------------|--|--|
| Total PEVS                 |  |  |
| SpO <sub>2</sub> %         |  |  |
| Blood pressure (mmHg)      |  |  |
| Temperature °C             |  |  |
| Age-appropriate pain scale |  |  |
| Blood glucose mmol/L       |  |  |

### Reference Values – Pediatric Vital Signs

| Age             | Respiratory rate (breaths/min) | Resting heart rate (beats/min) | Systolic BP (mmHg) | Diastolic BP (mmHg) |
|-----------------|--------------------------------|--------------------------------|--------------------|---------------------|
| 0-1 months      | 40-55                          | 100-160                        | 65-95              | 35-55               |
| 1-13 months     | 35-45                          | 100-160                        | 75-100             | 45-55               |
| 13 months - 4 y | 25-35                          | 90-130                         | 80-105             | 40-60               |
| 4-7 y           | 20-24                          | 70-120                         | 85-110             | 45-70               |
| 7-13 y          | 19-22                          | 70-110                         | 95-115             | 50-75               |
| 13-18 y         | 14-19                          | 55-95                          | 105-125            | 50-80               |

### ACT Result / Concern override

Red       Orange       Yellow       Green
