# Supplementary material for: The ACT and the ADJUST framework: Layering structured detection and clinical judgment in emergency department triage
Source: Research Square preprint supplement (doi:10.21203/rs.3.rs-7852065/v1), 2025-11-21
Supplement: Supplementary file 2 [file 4dd778d02556a170f4e3129f.docx]

### **Supplementary File 2. ACT–ADJUST Cross-Classification Matrix**

####

#### **Overview**

This file presents the cross-tabulation of acuity categories assigned by the structured nurse-led intake tool (**ACT**) and the subsequent physician reassessment (**ADJUST**).

The matrix shows agreement and the extent of upward or downward reclassification within the study cohort.

Rows represent ACT (initial triage); columns represent ADJUST (reassessment).

### **Cross-Classification Matrix: ACT vs. ADJUST**

| **ACT → ADJUST** | **Red** | **Orange** | **Yellow** | **Green** | **Row total (ACT)** |
| --- | --- | --- | --- | --- | --- |
| **Red** | **1607** | 3196 | 971 | 41 | **5,815** |
| **Orange** | 141 | **7581** | 12713 | 671 | **21,106** |
| **Yellow** | 17 | 772 | **11074** | 1848 | **13,711** |
| **Green** | 3 | 44 | 561 | **1641** | **2,249** |
| **Column total (ADJUST)** | **1,768** | **11,593** | **25,319** | **4,201** | **42,881 (total)** |

##

## Diagonal cells = agreement between ACT and ADJUST; cells above the diagonal = downgrades by ADJUST; cells below = upgrades. Totals verify the 42 881 paired encounters analyzed.

##

## **Reclassification Summary**

| **Classification Change** | **Count** | **% of total (n = 42,881)** |
| --- | --- | --- |
| Match (ACT = ADJUST) | **21,903** | **51.1%** |
| Upgrade by ADJUST | 1,538 | 3.6% |
| Downgrade by ADJUST | 19,440 | 45.3% |
| **Total** | 42,881 | 100% |

**Interpretation**

- Approximately half of ACT assignments were unchanged after physician reassessment.
- Downgrades were common (45%), mainly from Red or Orange categories; upgrades were infrequent (< 4%).
- These findings illustrate ACT’s **high initial sensitivity** and ADJUST’s role as a **specificity-enhancing contextual review**.
- Results are descriptive and may not generalize beyond this single-centre implementation.
